# Supplementary material for: Analysis of copy number variants and segmental duplications in the human genome: Evidence for a change in the process of formation in recent evolutionary history
Source: HighWire-hosted journal article supplement (doi:10.1101/gr.081422.108), 2008-10-08

# Supplement for: Copy Number Variants and Segmental Duplications Show Different Formation Signatures

Philip M. Kim\*, Hugo Y.K. Lam\*, Alexander E. Urban, Jan O. Korbel, Xueying Chen,  
Michael Snyder and Mark B. Gerstein

## Supplement Tables

### Table S1

Repeat elements and their association with SDs and CNVs in different datasets. See attached Excel table. Also variation of bin sizes.

### Table S2

Association of CNVs with repeat elements according to CNV size. As can be seen, different sizes of CNV associate with different significance with repeat elements. While the >1Mb column may be misleading (since very few events were recorded here), we see as a general trend that larger CNVs tend to associate better with repeats, most notably with L1 Lines, Alu elements and SDs.

| Association    | <10kb   | 10kb-100kb | 100kb-1000kb | >1Mb   |
|----------------|---------|------------|--------------|--------|
| Alu            | -0.0036 | -0.0037    | 0.0047       | 0.0015 |
| L1 LINE        | -0.0002 | 0.0131     | 0.0096       | 0.002  |
| L2 LINE        | 0.0073  | 0.0008     | -0.0045      | 0.0008 |
| Microsatellite | -0.0018 | 0.0077     | 0.0213       | 0.0065 |
| SD             | 0.0114  | 0.0511     | 0.0694       | 0.0219 |
| p-value        | <10kb   | 10kb-100kb | 100kb-1000kb | >1Mb   |
| Alu            | 0.0465  | 0.0376     | 0.0088       | 0.4074 |
| L1 LINE        | 0.9135  | 0          | 0            | 0.2704 |
| L2 LINE        | 0.0001  | 0.6441     | 0.012        | 0.6491 |
| Microsatellite | 0.3097  | 0          | 0            | 0.0003 |
| SD             | 0       | 0          | 0            | 0      |

**Table S3**

Data summary. Analyzed genomic elements and their occurrence in the human genome build36 are given.

| Repeat                   | Count     |
|--------------------------|-----------|
| CNV                      | 11,942    |
| Redon                    | 6,458     |
| Cooper                   | 4,124     |
| Korbel                   | 1,293     |
| Korbel (newly Sequenced) | 67        |
| SD                       | 51,838    |
| Alu                      | 1,193,407 |
| L1 LINE                  | 927,393   |
| L2 LINE                  | 409,271   |
| LTR                      | 656,486   |
| Microsatellite           | 422,698   |
| Processed Pseudogene     | 10,999    |

## Supplement Figures:

**Supplement figure S1:** Data summary by bin. The frequency of 100K genomic bins containing different repeat elements are given. E.g., most genomic bins (~4800, equivalent to 4.8 Gb) contain 15 to 20 Alu elements, whereas only a very small fraction contains more than 200 Alu elements.

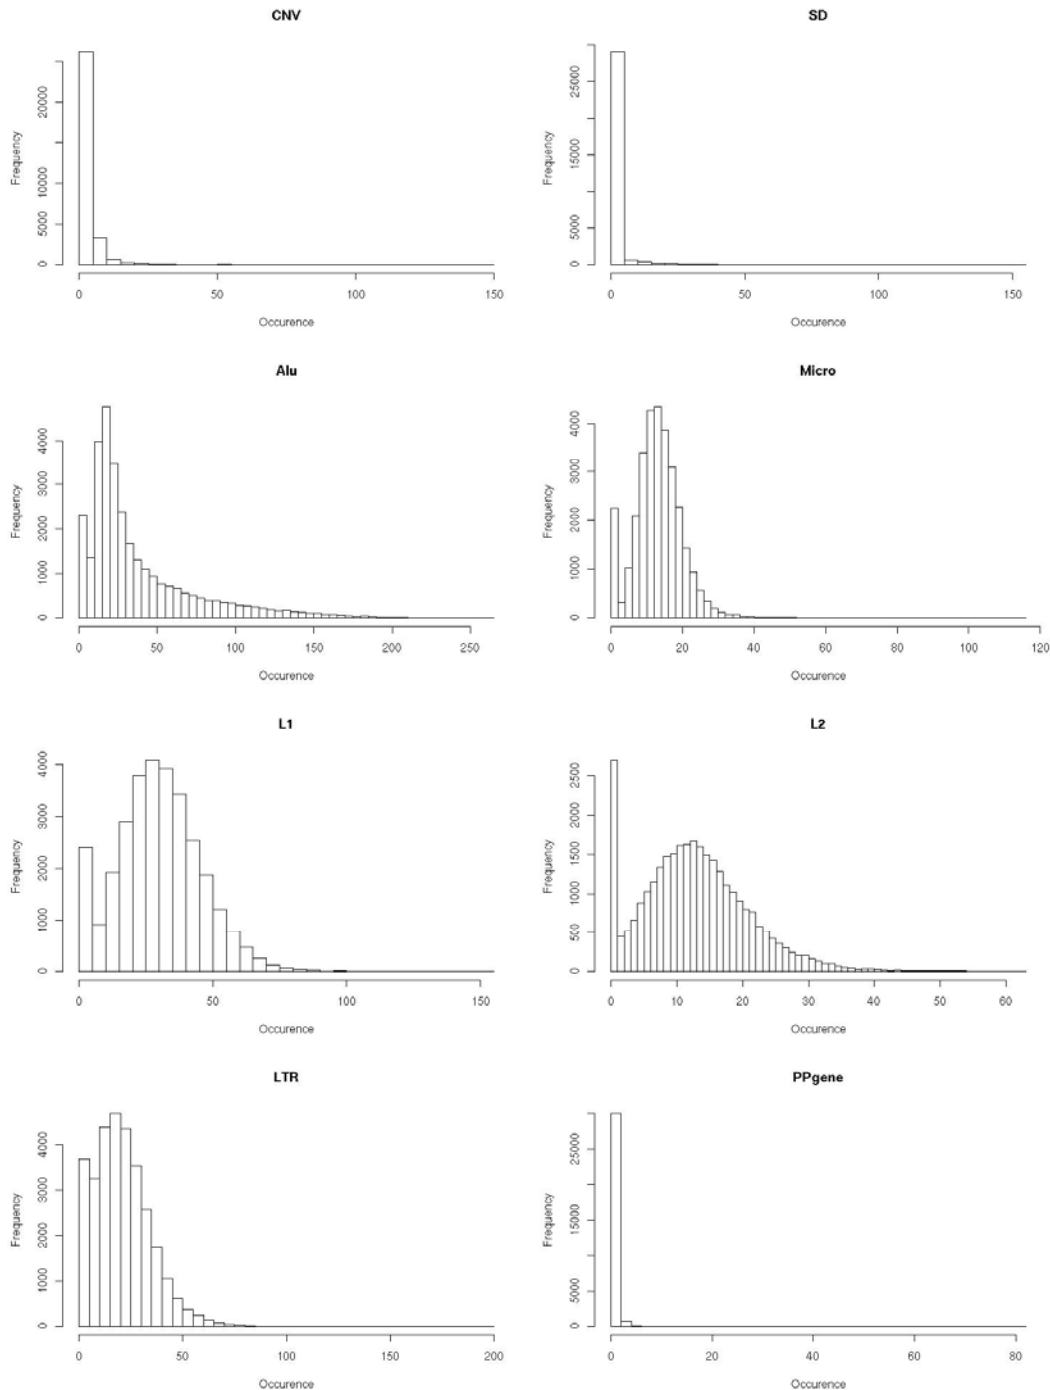

**Supplement figure S2:** Analysis of compiled CNV dataset (Cooper et al. 2007, Korbel et al. 2007, Redon et al. 2006).

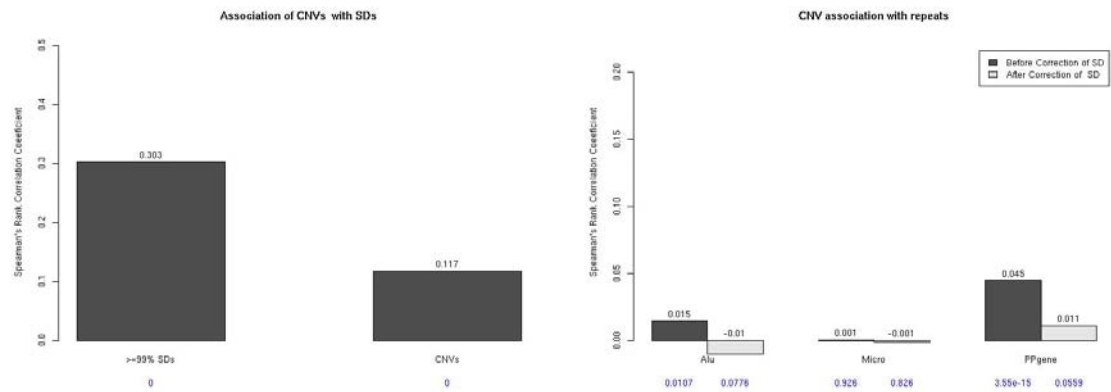

**Supplement figure S3:** Association of SD and repeats with correction of GC content.

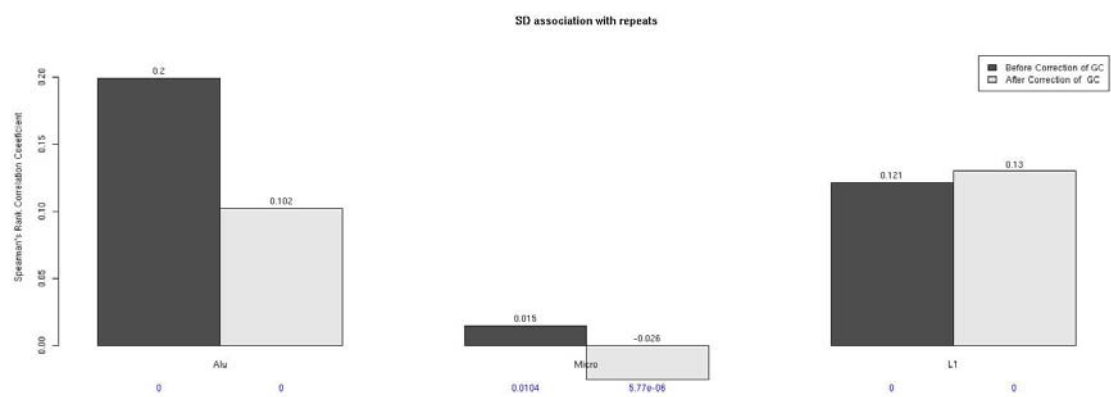

**Supplement figure S4:** SD binned into sequence identity categories with different number bins. (Black line: SD; Red line: SD associated with ALU; Blue line: SD associated with L1)

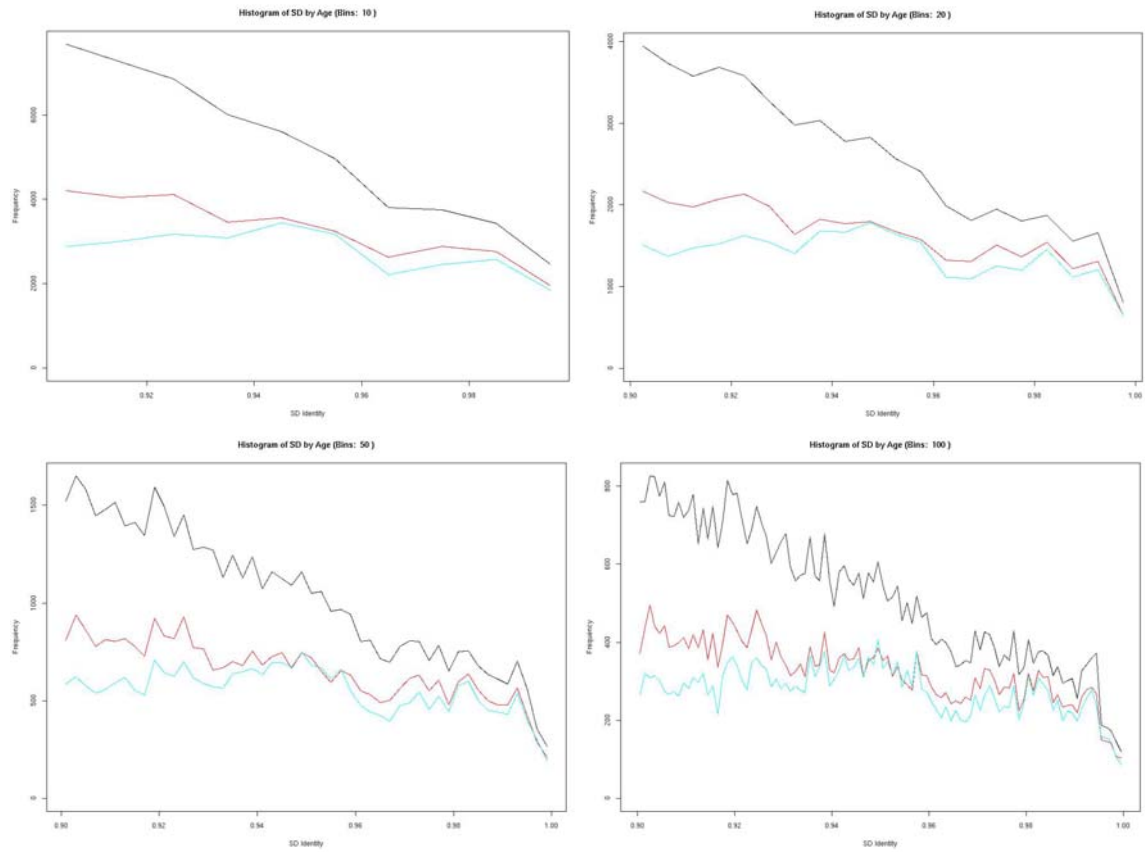

Supplement: 080924_SD_CNV_Supplement.pdf [file 080924_SD_CNV_Supplement.pdf]
